# Metformin inhibits high glucose-induced smooth muscle cell proliferation and migration

Dong-Ming Zhou<sup>1,\*</sup>, Feng Ran<sup>2,\*</sup>, Hai-Zhen Ni<sup>3,4,\*</sup>, Li-Li Sun<sup>3</sup>, Lun Xiao<sup>2</sup>, Xiao-Qiang Li<sup>2</sup>, Wen-Dong Li<sup>2</sup>

<sup>1</sup>Department of Hematology, The Affiliated Drum Tower Hospital, Nanjing University Medical School, Jiangsu, China

<sup>2</sup>Department of Vascular Surgery, The Affiliated Drum Tower Hospital, Nanjing University Medical School, Jiangsu, China

<sup>3</sup>Department of Vascular Surgery, The Second Affiliated Hospital of Soochow University, Jiangsu, China

<sup>4</sup>Department of Vascular Surgery, The First Affiliated Hospital of Wenzhou Medical University, Zhejiang, China

\*Equal contribution

**Correspondence to:** Xiao-Qiang Li, Wen-Dong Li; **email:** [vasculars@126.com](mailto:vasculars@126.com), [vasculars@163.com](mailto:vasculars@163.com)

**Keywords:** metformin, smooth muscle cells, HMGB1, autophagy, miR-142-3p

**Received:** December 30, 2019

**Accepted:** February 20, 2020

**Published:** March 24, 2020

**Copyright:** Zhou et al. This is an open-access article distributed under the terms of the Creative Commons Attribution License (CC BY 3.0), which permits unrestricted use, distribution, and reproduction in any medium, provided the original author and source are credited.

## ABSTRACT

We investigated the protective effects and mechanism of action of metformin on high glucose-induced smooth muscle cell proliferation and migration. Vascular smooth muscle cells (VSMCs) were subjected to a series of concentrations (0-10 mM) of metformin. CCK-8, wound healing, and transwell assays were performed. Correlations between metformin concentration and high-mobility group box 1 (HMGB1) and miR-142-3p levels were assessed. In addition, miR-142-3p mimic and siRNA were used to investigate VSMC migration in the presence or absence of metformin. In the high-glucose condition, metformin decreased cell growth and inhibited cell migration. HMGB1 gene expression correlated negatively with metformin concentration, whereas miR-142-3p expression correlated positively with metformin concentration. In addition, mimic-induced miR-142-3p elevation resulted in decreased HMGB1 and LC3II levels and elevated p62 levels in the high-glucose condition, whereas miR-142-3p knockdown had the reverse effects, and metformin abolished those effects. Metformin inhibits high glucose-induced VSMC hyperproliferation and increased migration by inducing miR-142-3p-mediated inhibition of HMGB1 expression via the HMGB1-autophagy related pathway.

## INTRODUCTION

Arteriosclerosis obliterans (ASO) is a major cause of death and disability, particularly in patients with diabetes mellitus (DM) [1, 2]. This is because the inflammation underlying atherosclerosis exacerbated by hyperglycemic states [3]. High-mobility group box 1 (HMGB1), is a crucial inflammatory factor in atherosclerosis [4–6], and a danger signal for vascular disease [7]. Abundant HMGB1 within carotid and coronary atherosclerotic plaques [8] contributes to the abnormal proliferation and migration of vascular smooth muscle cells (VSMCs) [9, 10]. This makes HMGB1

inhibition potentially effective therapeutic approach to atherosclerosis.

MicroRNAs affect gene expression, and their dysregulation increases inflammation and leads to atherosclerosis [11–13]. Studies have shown that many microRNAs, including miR-504, -200, -138 and -210, regulate the proliferation and migration of VSMCs [3]. Furthermore, studies have determined that some microRNAs inhibit the expression of HMGB1 [14–16]. Thus inhibiting HMGB1 expression via microRNAs in VSMCs may be a therapeutic approach to reduce atherothrombotic events.

Metformin, which is used to treat type 2 DM, may suppress diabetes-accelerated atherosclerosis [17, 18] via AMPK-mediated inhibition of VSMC proliferation and migration [19]. Metformin's promotion of microRNA expression and anti-inflammatory effects also contribute to this process [19–21]. In prior studies, metformin was found to inhibit the expression and release of HMGB1 [22, 23]. We therefore speculated that metformin may inhibit high glucose-induced VSMC proliferation and migration via microRNA-mediated inhibition of HMGB1 expression. To test that idea, VSMCs were isolated from the rat aorta and characterized by fluorescence microscopy and subjected to a high-glucose environment and a series metformin concentrations (0-10 mM). Our findings suggest metformin inhibits glucose-induced VSMC hyperproliferation and migration by inhibiting HMGB1 expression via the HMGB1-autophagy related pathway

## RESULTS

### Metformin inhibited high glucose-induced VSMC hyperplasia in a dose-dependent manner

To evaluate the effects of metformin on VSMCs in a high-glucose condition, we first isolated and characterized the VSMC and confirmed the presence of the VSMC marker  $\alpha$ -SMA in these cells (Figure 1A). We then subjected the cells to a high-glucose environment and examined the cell proliferation. Finally, metformin was added, and the results showed

that metformin at concentrations of 1, 5, and 10 mM significantly inhibited high glucose-induced VSMC hyperproliferation (Figure 1B).

### Metformin inhibited high glucose-induced VSMC migration via the HMGB1-autophagy related pathway

To further evaluate the effects of metformin on high glucose-induced VSMC behavior, a two dimensional scratch assay and three dimensional transwell assay were performed. The results showed significant inhibition of high glucose-induced cell migration when metformin was added to the assays. Metformin also resulted in decreased cell migration under normal glucose condition (Figure 2A, 2B). In addition, we also evaluated the expression of HMGB1-autophagy related pathway molecules and found that metformin treatment resulted in inhibition of the elevated HMGB1 and LC3II levels and the decreased p62 level found in the high-glucose condition. Similarly, the addition of metformin resulted in decreased HMGB1 and LC3II levels and increased p62 level in the normal glucose condition (Figure 2C). These results indicate that metformin rectifies high glucose-induced VSMC migration enhancement via the HMGB1-autophagy related pathway.

### Metformin inhibited HMGB1 expression by increasing miR-142-3p expression in VSMC

To further clarify the regulatory network involved in the effects of metformin on high glucose-induced VSMC

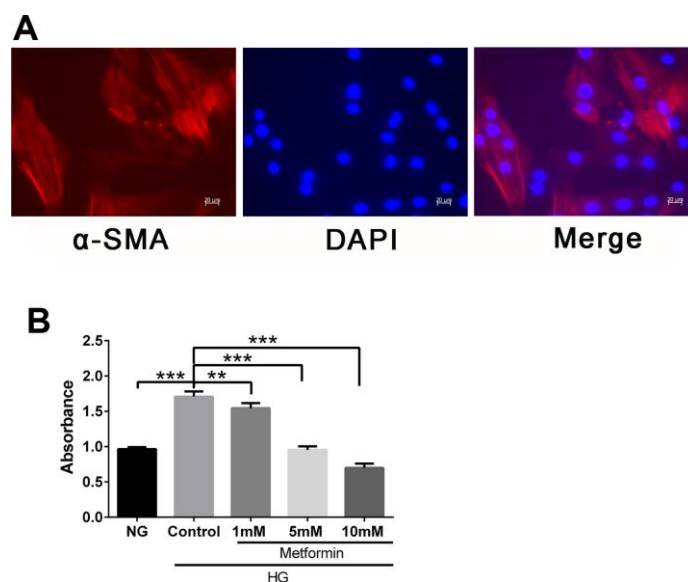

**Figure 1. Metformin inhibited high glucose-induced vascular smooth muscle cell (VSMC) hyperplasia in a dose-dependent manner.** (A) VSMC characterization by fluorescence microscopy. Expression of smooth muscle cell marker  $\alpha$ -SMA was confirmed by red fluorescence. (B) CCK-8 evaluation of the effects of metformin on VSMC proliferation. Significant inhibition of high glucose-induced cell proliferation was found at metformin concentrations of 1, 5, and 10 mM. \*\* $p < 0.01$  and \*\*\* $p < 0.001$  for between-group comparisons.

proliferation and migration, we performed gene expression analysis and correlation analysis between HMGB1, and miR-142-3p expression and metformin concentration. A negative correlation was found between HMGB1 gene level and metformin concentration (Figure 3A, 3B), and a positive correlation was found between miR-142-3p level and metformin concentration (Figure 3C, 3D).

To confirm that HMGB1 is regulated by miR-142-3p, reporter assays were performed. Results showed that miR-142-3p mimics significantly reduced the expression of HMGB1 (Figure 3E). miR-142-3p was also shown to inhibit HMGB1 expression by directly binding to its 3'-UTR segment. To confirm the ability of miR-142-3p to suppress HMGB1 expression, VSMCs were transfected with miR-142-3p mimics

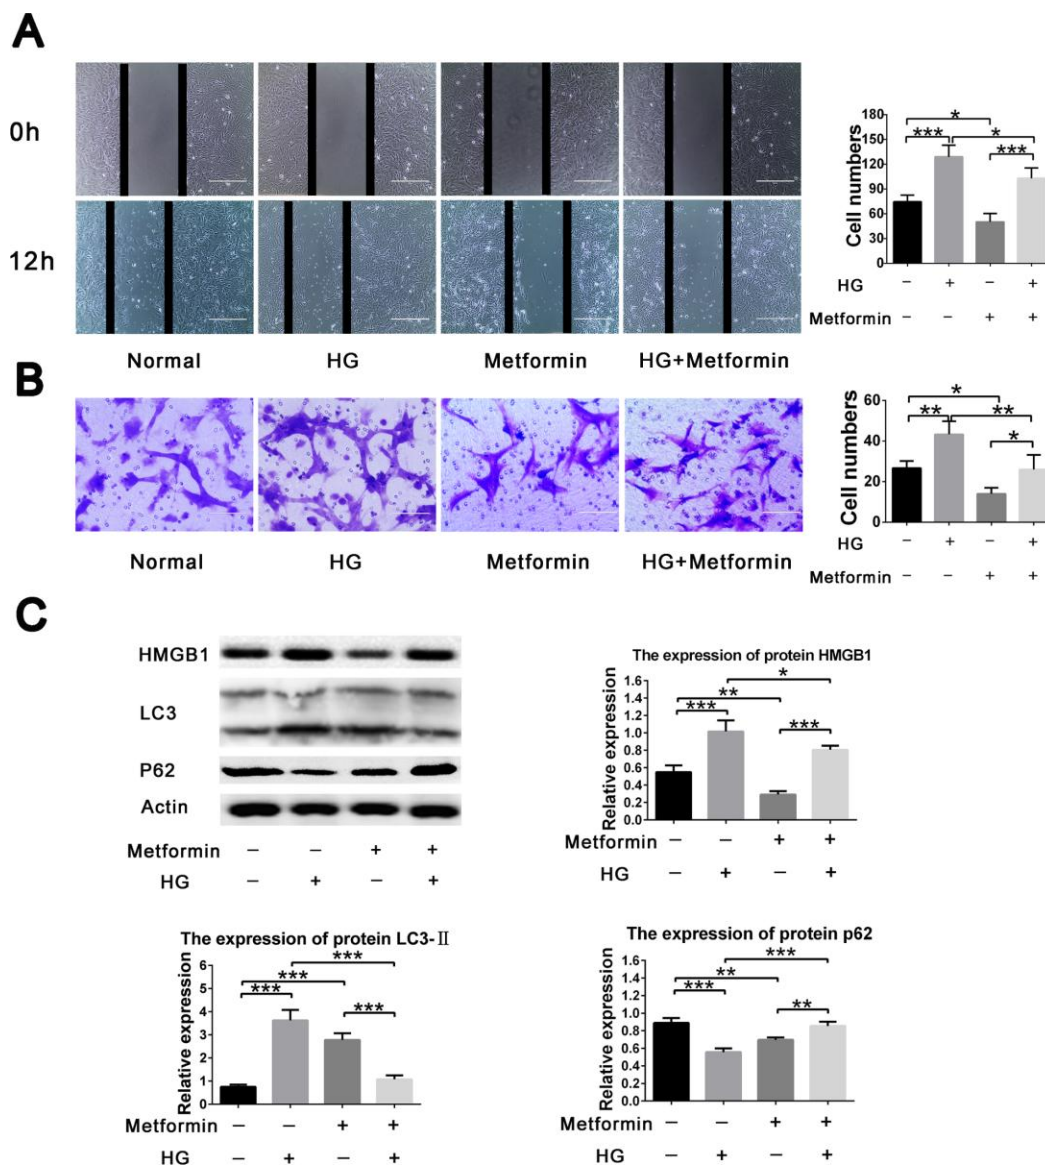

**Figure 2. Metformin inhibited high glucose-induced vascular smooth muscle cell (VSMC) migration via HMGB1-autophagy related pathway.** (A) Metformin inhibited high glucose-induced VSMC migration in a two dimensional scratch assay. Significant inhibition of cell migration was found when metformin was added in the high-glucose condition; in addition, metformin resulted in decreased cell migration in the normal glucose condition. (B) Metformin inhibited high glucose-induced VSMC migration in a three dimensional transwell assay. Significant inhibition of cell migration was found when metformin was added in the high-glucose condition; in addition, metformin resulted in decreased cell migration in the normal glucose condition. (C) The HMGB1-autophagy related pathway was involved in the effects of metformin on high glucose-induced cell migration. Metformin resulted in decreased HMGB1 and LC3II levels and increased the p62 level in the high-glucose condition. In addition, metformin resulted in decreased HMGB1 and p62 levels and increased LC3II level in the normal glucose condition. \* $p < 0.05$ , \*\* $p < 0.01$  and \*\*\* $p < 0.001$  for between-group comparison.

and inhibitor (Figure 3F). The group containing miR-142-3p mimics displayed a robustly decreased HMGB1 protein level, whereas VSMCs in the group with miR-142-3p inhibitor demonstrated an increased HMGB1 protein level (Figure 3G, 3H). These results indicate that metformin decreases HMGB1 expression by promoting miR-142-3p in VSMCs.

**miR-142-3p overexpression by mimic and inhibition by siRNA result in inhibition and promotion, respectively of high glucose-induced VSMCs migration via the Akt/PI3K/autophagy related pathway**

To further verify the role of miR-142-3p in high glucose-induced VSMC migration, miR-142-3p

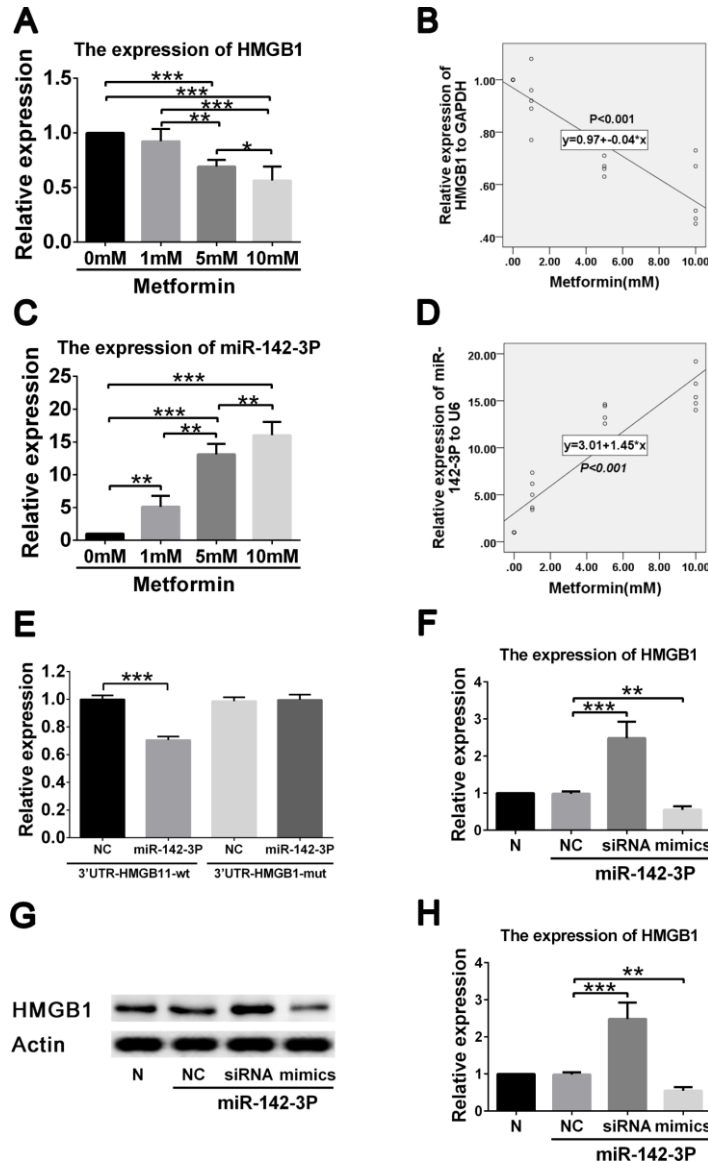

**Figure 3. Metformin exerts effects on HMGB1 via affecting miR-142-3p in vascular smooth muscle cells (VSMCs).** (A) Decreased HMGB1 gene expression in a metformin dose-dependent manner by quantitative real-time PCR. (B) Correlation analysis revealed that negative correlation was found between metformin concentration and HMGB1 gene expression. (C) Increased miR-142-3p expression in a metformin dose-dependent manner by quantitative real-time PCR. (D) Correlation analysis revealed that positive correlation was found between metformin concentration and miR-142-3p gene expression. (E) Decreased HMGB1 level was found in HMGB1-WT-3'UTR + miR-142-3p transfected VSMCs compared to HMGB1-WT-3'UTR + control vector transfected VSMCs, whereas HMGB1 level was similar between HMGB1-MUT-3'UTR + miR-142-3p transfected VSMCs and HMGB1-MUT-3'UTR + control vector transfected VSMCs. (F) miR-142-3p overexpression and inhibition by mimics and siRNA resulted in decreased and increased HMGB1 gene expression in VSMCs, respectively. (G) miR-142-3p overexpression and inhibition by mimics and siRNA resulted in decreased and increased HMGB1 protein expression in VSMCs, respectively. (H) Relative quantification of HMGB1 level. \*\*p < 0.01 and \*\*\*p < 0.001 for between group comparison.

overexpression and inhibition were induced by mimic and siRNA transfection, respectively. We found that miR-142-3p overexpression by mimic and inhibition by siRNA resulted in inhibition and promotion, respectively, of high glucose-induced VSMC migration via the HMGB1-autophagy related pathway. However, metformin abolished the effects of miR-142-3p siRNA (Figure 4A, 4B). Further analysis revealed that miR-

142-3p overexpression by mimic resulted in inhibition of HMGB1 and LC3II levels and elevated p62 level in high glucose-induced VSMC migration enhancement. However, miR-142-3p siRNA generated the reverse effects, and metformin abolished the effects of miR-142-3p siRNA (Figure 4C). These results confirm the effects of miR-142-3p on the migration behavior of VSMCs in the high-glucose condition.

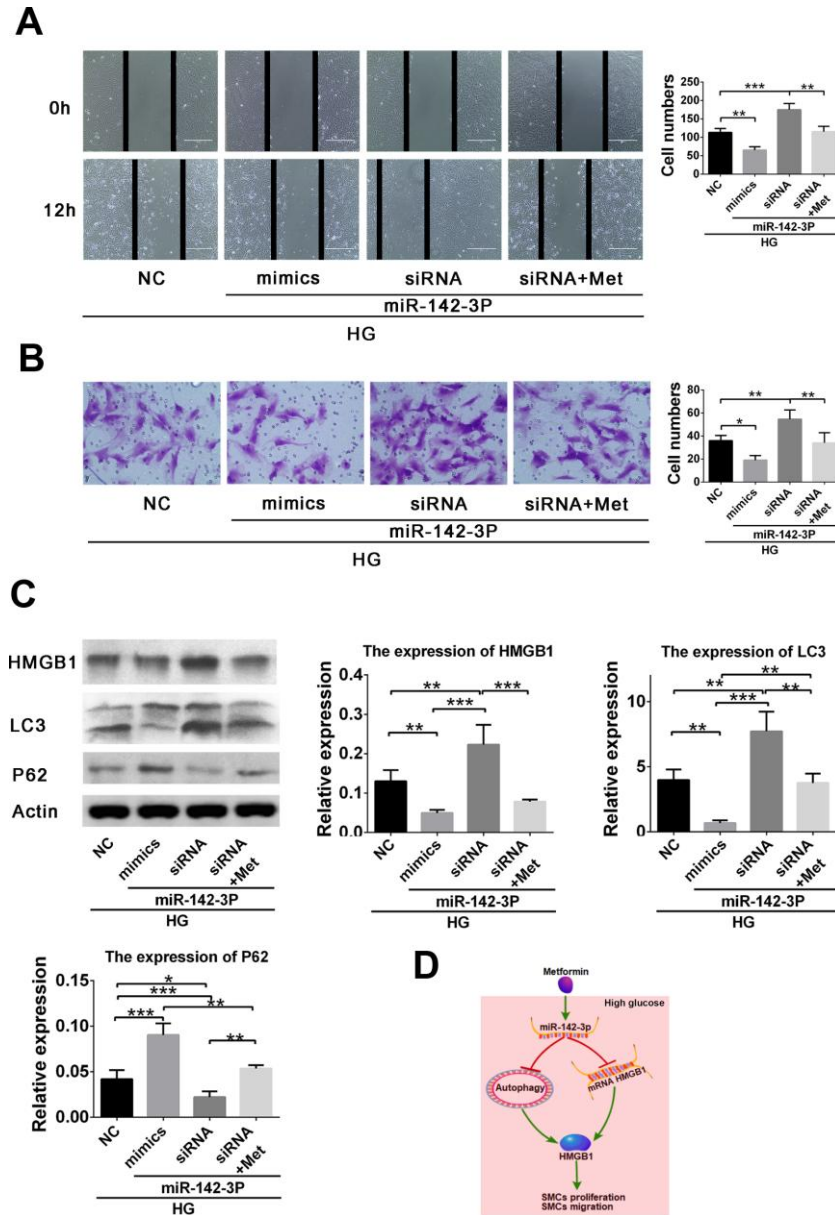

**Figure 4. miR-142-3p overexpression by mimic and miR-142-3p inhibition by siRNA resulted in inhibition and promotion, respectively, of high glucose-induced vascular smooth muscle cell (VSMC) migration enhancement via the HMGB1-autophagy related pathway, whereas metformin abolished the effects of miR-142-3p siRNA.** (A) Scratch assay for the effects of miR-142-3p overexpression and inhibition. (B) Transwell assay for the effects of miR-142-3p overexpression and inhibition. (C) miR-142-3p overexpression by mimic results in decreased HMGB1 and LC3II and elevated p62 level in high glucose-induced VSMC migration enhancement, whereas miR-142-3p siRNA caused the opposite effects and metformin abolished the effects of miR-142-3p siRNA. (D) Schematic of the role of metformin in the regulation of VSMC proliferation and migration. \* $p < 0.05$ , \*\* $p < 0.01$  and \*\*\* $p < 0.001$  for between-group comparison.

## DISCUSSION

Abnormal proliferation and migration of VSMC, which is enhanced by inflammation in hyperglycemic states, contribute to the formation of atherosclerotic lesions [24]. According to previous studies, metformin attenuates early-stage atherosclerosis in mildly hyperglycemic Oikawa-Nagao mice [17]. This may be due to the inhibition of the inflammatory response and vascular calcification in VSMC by metformin [24, 25]. Metformin also inhibits proliferation of tumor and endothelial cells [26, 27]. In our study, metformin decreased VSMC proliferation in the high-glucose condition. In addition, VSMC migration was also inhibited by metformin. Finally, increased miR-142-3p expression was shown to inhibit VSMC proliferation and migration via the HMGB1-autophagy related pathway (Figure 4D).

HMGB1 is an inflammatory factor that increase VSMC proliferation and high glucose-induced calcification in VSMC and subsequent vascular inflammation and atherosclerosis [4, 28, 29]. In addition, HMGB1 has been identified as an autophagy sensor in oxidative stress [30], and autophagy may regulate the expression and release of HMGB1 [31]. However, increasing evidences indicates that HMGB1 is downregulated by metformin [23]. In our previous studies, we found that metformin induced autophagy by activating AMPK, resulting in decreased proliferation and migration of endothelial progenitor cells [32, 33]. In the present study, we also found that metformin inhibits the proliferation and migration of VSMC induced by elevated glucose. This might be related to the autophagy pathway promoted by metformin.

It has been well demonstrated that many microRNAs affect atherosclerosis by inhibiting cardiovascular inflammation [13, 34]. MiR-142-3p, one of the novel inflammation-related miRNAs [35], is significantly upregulated by metformin [36]. It may inhibit cell proliferation and migration via the WNT signaling pathway and autophagy [37–39]. In addition, miR-142-3p may target HMGB1 in tumor cells [14, 40]. Consistently, we found that miR-142-3p inhibited migration enhancement in high glucose-stimulated VSMC. These findings validate that miR-142-3p is involved in the regulation of abnormal VSMC proliferation and migration, which contribute to ASO and in-stent restenosis. However, these findings contradict some previous studies. For example, Bao et al found that miR-142-3p promoted endothelial cell proliferation via Bcl-2-associated transcription factor 1 [41]. In addition, Wu et al found that miR-142-3p promoted the neuronal cell cycle and inhibited apoptosis after peripheral nerve injury [42]. Thus, further investigation, especially the appropriate animal

model studies, of microRNAs involved in the regulation of cell growth should be performed to clarify these issues. In conclusion, we demonstrated that metformin inhibits high glucose-induced VSMC hyperproliferation and migration enhancement by promoting miR-142-3p-mediated inhibition of HMGB1 expression via the autophagy pathway.

## MATERIALS AND METHODS

### VSMC isolation and characterization

All research involving experimental animals was approved by the Institutional Review Board of the Drum Tower Hospital Affiliated to Medical School of Nanjing University, Nanjing, China, and adhere to the international experiment guideline. VSMCs, obtained from the aortic artery, were cultured with DMEM containing 20% FBS at 37°C. Immunofluorescence with  $\alpha$ -actin was carried out to identify the cells [43].

### Cell treatment

VSMCs were grown to 70%-80% cell confluence and exposed to normal glucose (5.6 + 19.4 mmol/L mannitol) or High Glucose (25 mmol/L) for 24 hours. Metformin was added to the high glucose-treated cells. In the cell proliferation assay, metformin was used at a serial concentration of 1, 5, and 10 mM. The concentration of metformin in the cell migration assay was 5 mM.

### CCK-8 assay for cell growth

Trypsinized VSMCs ( $2 \times 10^5$  cells) were resuspended in complete VSMC medium and seeded in a 12-well plate and incubated with 0, 1, 5 and 10 mM of metformin in the previously mentioned normal and high-glucose conditions under 37°C, 5% CO<sub>2</sub>. One day later, cell proliferation was evaluated by CCK-8 assay following the manufacturer's instructions. At least triplicate repeats were completed in all the experiments.

### Wound healing assay

VSMCs were allowed to be grown to 80%-90% cell confluence and treated with normal glucose or high glucose in the absence or presence of metformin. A scratch was made by a 200  $\mu$ L pipette tip at 0 h and incubated at 37°C, 5% CO<sub>2</sub>. Pictures were taken using microscopy at 0 and 24 h for migration evaluation.

### Transwell assay

A modified transwell assay in 24-well plates was used for cell migration evaluation (BD Biosciences, San Jose, CA, USA). After cell transfection for 24 h, cells were

**Table 1. Primer sequence.**

| Gene name  | Forward                    | Reverse                    |
|------------|----------------------------|----------------------------|
| HMGB1      | 5'-AGCAATCTGAACGTCTGTCC-3' | 5'-GTTCTTGTGATAGCCTTCGC-3' |
| GAPDH      | 5'-GCGCTGAGTACGTCG-3'      | 5'-CAGTTGGTGGTGCAG-3'      |
| MiR-142-3p | TGTAGTGTTTCCTACTTTATGGA    |                            |
| U6         | CTCGCTTCGGCAGCAC           | AACGCTTACGAATTTGCGT        |

suspended with serum-free DMEM at a concentration of  $3 \times 10^5$  cells and added to the upper chamber, while the lower chamber was filled with DMEM supplemented with 20% FBS as a chemoattractant. Then the transwell plate was incubated at 37°C for 24 h, and a cotton swab was used to remove upper chamber residue cells. The transwell membrane close to the lower chamber was cut by scissors, stained with crystal violet and photographed by a microscope. The cells were then counted according to the pictures.

### Cell transfection

miR-142-3p mimic, siRNA, and their negative controls were purchased from Thermo. miR-142-3p mimic (50 nM), siRNA (150 nM), and their negative controls were transfected, into VSMCs at 80% confluence using Lipofectamine 3000 (Invitrogen, Carlsbad, CA, USA) according to the manufacturer's instructions. After 48 h of transfection, cells were harvested for subsequent experiments, and the expression of microRNA was confirmed by real-time reverse transcriptase quantitative polymerase chain reaction (RT-qPCR), described later.

### Luciferase assay

Luciferase reporter assay was performed, as previously described [44], to explore the potential regulation mechanisms of miR-142-3p. For the measurement of luciferase activity, cells were cotransfected in 24-well plates with 100 ng of luciferase plasmid and 50 ng of Renilla plasmid (Ambion) as a control, as well as with 400 ng of miR-142-3p mimics or negative control microRNA. The luciferase and Renilla plasmid activities were measured 48 h later using the Dual Luciferase Reporter 1000 Assay System (Promega, Madison, WI, USA).

### RT-qPCR

RT-qPCR was performed as previously reported [44, 45]. Briefly, total RNA was isolated from the VSMCs treated with the series of metformin concentration. Real-time PCR detection was performed when generation of cDNA for RT-qPCR was done. GAPDH expression and U6 expression were used as controls for HMGB1 and microRNA gene, respectively.

Relative microRNA expression was normalized to the reference microRNA expression using the  $\Delta\Delta Ct$  method. All primer sequences are listed in Table 1.

### Western blot analysis

Cellular protein was extracted from VSMCs ( $1 \times 10^5$  cells), as previously reported [44]. Briefly, the proteins were separated and then transferred. After blocking, membranes were incubated with HMGB1 (Cell Signaling Technology [CST], Danvers, MA, USA), LC3II/I (CST), p62 (CST), and Actin (Sigma, St. Louis, MO, USA). Appropriate secondary antibodies were used. The protein bands were detected using an Infrared Imaging System (LI-COR).

### Statistical analysis

All statistical analyses were performed using SPSS v21. Data are presented as mean  $\pm$  SD. Student's t test or one-way ANOVA was used to examine the differences between the groups. Correlations between HMGB-1 and miR-142-3p levels and metformin concentration were analyzed using the Pearson correlation method.  $P < 0.05$  was considered as statistically significant.

### CONFLICTS OF INTEREST

The authors confirm that there are no potential conflicts of interest.

### FUNDING

This work was supported by grants from the National Natural Science Foundation of China (No. 81770483, 81800418), the Natural Science Foundation of Jiangsu Province (No. BK20180125), the Key Project supported by Medical Science and technology development Foundation (No. YKK18063), Nanjing Department of Health, and the Fundamental Research Funds for the Central Universities (No. 021414380362).

### REFERENCES

1. Low Wang CC, Hess CN, Hiatt WR, Goldfine AB. Clinical Update: Cardiovascular Disease in Diabetes Mellitus:

- Atherosclerotic Cardiovascular Disease and Heart Failure in Type 2 Diabetes Mellitus - Mechanisms, Management, and Clinical Considerations. *Circulation*. 2016; 133:2459–502.  
<https://doi.org/10.1161/CIRCULATIONAHA.116.022194>  
PMID:27297342
2. Eckel RH, Hokanson JE. The Prediction of Atherosclerotic Cardiovascular Disease in Type 1 Diabetes Mellitus: Do We Just Stop Here? *Circulation*. 2016; 133:1051–53.  
<https://doi.org/10.1161/CIRCULATIONAHA.116.021654>  
PMID:26888766
  3. Yuan T, Yang T, Chen H, Fu D, Hu Y, Wang J, Yuan Q, Yu H, Xu W, Xie X. New insights into oxidative stress and inflammation during diabetes mellitus-accelerated atherosclerosis. *Redox Biol*. 2019; 20:247–60.  
<https://doi.org/10.1016/j.redox.2018.09.025>  
PMID:30384259
  4. de Souza AW, Westra J, Limburg PC, Bijl M, Kallenberg CG. HMGB1 in vascular diseases: its role in vascular inflammation and atherosclerosis. *Autoimmun Rev*. 2012; 11:909–17.  
<https://doi.org/10.1016/j.autrev.2012.03.007>  
PMID:22495229
  5. Fan Z, Yang J, Yang J, Yang C, Guo X. HMGB1: A promising therapeutic approach for atherosclerosis. *Int J Cardiol*. 2016; 202:507–08.  
<https://doi.org/10.1016/j.ijcard.2015.09.101>  
PMID:26440462
  6. Cai J, Wen J, Bauer E, Zhong H, Yuan H, Chen AF. The Role of HMGB1 in Cardiovascular Biology: danger Signals. *Antioxid Redox Signal*. 2015; 23:1351–69.  
<https://doi.org/10.1089/ars.2015.6408>  
PMID:26066838
  7. Yan XX, Lu L, Peng WH, Wang LJ, Zhang Q, Zhang RY, Chen QJ, Shen WF. Increased serum HMGB1 level is associated with coronary artery disease in nondiabetic and type 2 diabetic patients. *Atherosclerosis*. 2009; 205:544–48.  
<https://doi.org/10.1016/j.atherosclerosis.2008.12.016>  
PMID:19150066
  8. Inoue K, Kawahara K, Biswas KK, Ando K, Mitsudo K, Nobuyoshi M, Maruyama I. HMGB1 expression by activated vascular smooth muscle cells in advanced human atherosclerosis plaques. *Cardiovasc Pathol*. 2007; 16:136–43.  
<https://doi.org/10.1016/j.carpath.2006.11.006>  
PMID:17502242
  9. Porto A, Palumbo R, Pieroni M, Aprigliano G, Chiesa R, Sanvito F, Maseri A, Bianchi ME, Porto A, Palumbo R, Pieroni M, Aprigliano G, Chiesa R, et al. Smooth muscle cells in human atherosclerotic plaques secrete and proliferate in response to high mobility group box 1 protein. *FASEB J*. 2006; 20:2565–66.  
<https://doi.org/10.1096/fj.06-5867fje> PMID:17060403
  10. Jang EJ, Baek SE, Kim EJ, Park SY, Kim CD. HMGB1 enhances AGE-mediated VSMC proliferation via an increase in 5-LO-linked RAGE expression. *Vascul Pharmacol*. 2019; 118-119:106559.  
<https://doi.org/10.1016/j.vph.2019.04.001>  
PMID:30954689
  11. Nazari-Jahantigh M, Egea V, Schober A, Weber C. MicroRNA-specific regulatory mechanisms in atherosclerosis. *J Mol Cell Cardiol*. 2015; 89:35–41.  
<https://doi.org/10.1016/j.yjmcc.2014.10.021>  
PMID:25450610
  12. Menghini R, Stöhr R, Federici M. MicroRNAs in vascular aging and atherosclerosis. *Ageing Res Rev*. 2014; 17:68–78. <https://doi.org/10.1016/j.arr.2014.03.005>  
PMID:24681293
  13. Martens CR, Bansal SS, Accornero F. Cardiovascular inflammation: RNA takes the lead. *J Mol Cell Cardiol*. 2019; 129:247–56.  
<https://doi.org/10.1016/j.yjmcc.2019.03.012>  
PMID:30880251
  14. Liu K, Huang J, Ni J, Song D, Ding M, Wang J, Huang X, Li W. MALAT1 promotes osteosarcoma development by regulation of HMGB1 via miR-142-3p and miR-129-5p. *Cell Cycle*. 2017; 16:578–87.  
<https://doi.org/10.1080/15384101.2017.1288324>  
PMID:28346809
  15. Dormoy-Raclet V, Cammas A, Celona B, Lian XJ, van der Giessen K, Zivojnovic M, Brunelli S, Riuzzi F, Sorci G, Wilhelm BT, Di Marco S, Donato R, Bianchi ME, Gallouzi IE. HuR and miR-1192 regulate myogenesis by modulating the translation of HMGB1 mRNA. *Nat Commun*. 2013; 4:2388.  
<https://doi.org/10.1038/ncomms3388> PMID:24005720
  16. Zhan LY, Lei SQ, Zhang BH, Li WL, Wang HX, Zhao B, Cui SS, Ding H, Huang QM. Overexpression of miR-381 relieves neuropathic pain development via targeting HMGB1 and CXCR4. *Biomed Pharmacother*. 2018; 107:818–23.  
<https://doi.org/10.1016/j.biopha.2018.08.053>  
PMID:30142543
  17. Asai A, Shuto Y, Nagao M, Kawahara M, Miyazawa T, Sugihara H, Oikawa S. Metformin Attenuates Early-Stage Atherosclerosis in Mildly Hyperglycemic Oikawa-Nagao Mice. *J Atheroscler Thromb*. 2019; 26:1075–83.  
<https://doi.org/10.5551/jat.48223> PMID:30971640
  18. Wang Q, Zhang M, Torres G, Wu S, Ouyang C, Xie Z, Zou MH. Metformin Suppresses Diabetes-Accelerated Atherosclerosis via the Inhibition of Drp1-Mediated Mitochondrial Fission. *Diabetes*. 2017; 66:193–205.



- <https://doi.org/10.2337/db16-0915>  
PMID:27737949
19. Luo F, Das A, Chen J, Wu P, Li X, Fang Z. Metformin in patients with and without diabetes: a paradigm shift in cardiovascular disease management. *Cardiovasc Diabetol.* 2019; 18:54.  
<https://doi.org/10.1186/s12933-019-0860-y>  
PMID:31029144
  20. Zhou JY, Xu B, Li L. A New Role for an Old Drug: Metformin Targets MicroRNAs in Treating Diabetes and Cancer. *Drug Dev Res.* 2015; 76:263–69.  
<https://doi.org/10.1002/ddr.21265>  
PMID:26936407
  21. Pulito C, Donzelli S, Muti P, Puzzo L, Strano S, Blandino G. microRNAs and cancer metabolism reprogramming: the paradigm of metformin. *Ann Transl Med.* 2014; 2:58.  
<https://doi.org/10.3978/j.issn.2305-5839.2014.06.03>  
PMID:25333033
  22. Tsoyi K, Jang HJ, Nizamutdinova IT, Kim YM, Lee YS, Kim HJ, Seo HG, Lee JH, Chang KC. Metformin inhibits HMGB1 release in LPS-treated RAW 264.7 cells and increases survival rate of endotoxaemic mice. *Br J Pharmacol.* 2011; 162:1498–508.  
<https://doi.org/10.1111/j.1476-5381.2010.01126.x>  
PMID:21091653
  23. Huang WS, Lin CT, Chen CN, Chang SF, Chang HI, Lee KC. Metformin increases the cytotoxicity of oxaliplatin in human DLD-1 colorectal cancer cells through down-regulating HMGB1 expression. *J Cell Biochem.* 2018; 119:6943–52. <https://doi.org/10.1002/jcb.26898>  
PMID:29737584
  24. Kim SA, Choi HC. Metformin inhibits inflammatory response via AMPK-PTEN pathway in vascular smooth muscle cells. *Biochem Biophys Res Commun.* 2012; 425:866–72.  
<https://doi.org/10.1016/j.bbrc.2012.07.165>  
PMID:22898050
  25. Cao X, Li H, Tao H, Wu N, Yu L, Zhang D, Lu X, Zhu J, Lu Z, Zhu Q. Metformin inhibits vascular calcification in female rat aortic smooth muscle cells via the AMPK-eNOS-NO pathway. *Endocrinology.* 2013; 154:3680–89.  
<https://doi.org/10.1210/en.2013-1002>  
PMID:24025223
  26. Shao X, Cao X, Song G, Zhao Y, Shi B. Metformin rescues the MG63 osteoblasts against the effect of high glucose on proliferation. *J Diabetes Res.* 2014; 2014:453940.  
<https://doi.org/10.1155/2014/453940>  
PMID:24812633
  27. Han X, Wang B, Sun Y, Huang J, Wang X, Ma W, Zhu Y, Xu R, Jin H, Liu N. Metformin Modulates High Glucose-Incubated Human Umbilical Vein Endothelial Cells Proliferation and Apoptosis Through AMPK/CREB/BDNF Pathway. *Front Pharmacol.* 2018; 9:1266.  
<https://doi.org/10.3389/fphar.2018.01266>  
PMID:30459620
  28. Yang J, Chen L, Ding J, Fan Z, Li S, Wu H, Zhang J, Yang C, Wang H, Zeng P, Yang J. MicroRNA-24 inhibits high glucose-induced vascular smooth muscle cell proliferation and migration by targeting HMGB1. *Gene.* 2016; 586:268–73.  
<https://doi.org/10.1016/j.gene.2016.04.027>  
PMID:27085480
  29. Wang Y, Shan J, Yang W, Zheng H, Xue S. High mobility group box 1 (HMGB1) mediates high-glucose-induced calcification in vascular smooth muscle cells of saphenous veins. *Inflammation.* 2013; 36:1592–604.  
<https://doi.org/10.1007/s10753-013-9704-1>  
PMID:23928875
  30. Kang R, Livesey KM, Zeh HJ 3rd, Lotze MT, Tang D. HMGB1 as an autophagy sensor in oxidative stress. *Autophagy.* 2011; 7:904–06.  
<https://doi.org/10.4161/auto.7.8.15704>  
PMID:21487246
  31. Thorburn J, Frankel AE, Thorburn A. Regulation of HMGB1 release by autophagy. *Autophagy.* 2009; 5:247–49.  
<https://doi.org/10.4161/auto.5.2.7552>  
PMID:19098461
  32. Li WD, Li NP, Song DD, Rong JJ, Qian AM, Li XQ. Metformin inhibits endothelial progenitor cell migration by decreasing matrix metalloproteinases, MMP-2 and MMP-9, via the AMPK/mTOR/autophagy pathway. *Int J Mol Med.* 2017; 39:1262–68.  
<https://doi.org/10.3892/ijmm.2017.2929>  
PMID:28339020
  33. Li WD, Du XL, Qian AM, Hu N, Kong LS, Wei S, Li CL, Li XQ. Metformin regulates differentiation of bone marrow-derived endothelial progenitor cells via multiple mechanisms. *Biochem Biophys Res Commun.* 2015; 465:803–09.  
<https://doi.org/10.1016/j.bbrc.2015.08.091>  
PMID:26319555
  34. Laffont B, Rayner KJ. MicroRNAs in the Pathobiology and Therapy of Atherosclerosis. *Can J Cardiol.* 2017; 33:313–24. <https://doi.org/10.1016/j.cjca.2017.01.001>  
PMID:28232017
  35. Boomiraj H, Mohankumar V, Lalitha P, Devarajan B. Human corneal microRNA expression profile in fungal keratitis. *Invest Ophthalmol Vis Sci.* 2015; 56:7939–46.  
<https://doi.org/10.1167/iovs.15-17619>  
PMID:26720440
  36. Xia C, Liang S, He Z, Zhu X, Chen R, Chen J. Metformin, a first-line drug for type 2 diabetes mellitus, disrupts

- the MALAT1/miR-142-3p sponge to decrease invasion and migration in cervical cancer cells. *Eur J Pharmacol*. 2018; 830:59–67. <https://doi.org/10.1016/j.ejphar.2018.04.027> PMID:[29704494](https://pubmed.ncbi.nlm.nih.gov/29704494/)
37. Kim K, Yang DK, Kim S, Kang H. miR-142-3p Is a Regulator of the TGF $\beta$ -Mediated Vascular Smooth Muscle Cell Phenotype. *J Cell Biochem*. 2015; 116:2325–33. <https://doi.org/10.1002/jcb.25183> PMID:[25832008](https://pubmed.ncbi.nlm.nih.gov/25832008/)
38. Carraro G, Shrestha A, Rostkovius J, Contreras A, Chao CM, El Agha E, Mackenzie B, Dilai S, Guidolin D, Taketo MM, Günther A, Kumar ME, Seeger W, et al. miR-142-3p balances proliferation and differentiation of mesenchymal cells during lung development. *Development*. 2014; 141:1272–81. <https://doi.org/10.1242/dev.105908> PMID:[24553287](https://pubmed.ncbi.nlm.nih.gov/24553287/)
39. Zhai Z, Wu F, Dong F, Chuang AY, Messer JS, Boone DL, Kwon JH. Human autophagy gene ATG16L1 is post-transcriptionally regulated by MIR142-3p. *Autophagy*. 2014; 10:468–79. <https://doi.org/10.4161/auto.27553> PMID:[24401604](https://pubmed.ncbi.nlm.nih.gov/24401604/)
40. Fu Y, Sun LQ, Huang Y, Quan J, Hu X, Tang D, Kang R, Li N, Fan XG. miR-142-3p Inhibits the Metastasis of Hepatocellular Carcinoma Cells by Regulating HMGB1 Gene Expression. *Curr Mol Med*. 2018; 18:135–41. <https://doi.org/10.2174/1566524018666180907161124> PMID:[30198432](https://pubmed.ncbi.nlm.nih.gov/30198432/)
41. Bao H, Chen YX, Huang K, Zhuang F, Bao M, Han Y, Chen XH, Shi Q, Yao QP, Qi YX. Platelet-derived microparticles promote endothelial cell proliferation in hypertension via miR-142-3p. *FASEB J*. 2018; 32:3912–23. <https://doi.org/10.1096/fj.201701073R> PMID:[29481306](https://pubmed.ncbi.nlm.nih.gov/29481306/)
42. Wu DM, Wen X, Han XR, Wang S, Wang YJ, Shen M, Fan SH, Zhuang J, Zhang ZF, Shan Q, Li MQ, Hu B, Sun CH, et al. MiR-142-3p Enhances Cell Viability and Inhibits Apoptosis by Targeting CDKN1B and TIMP3 Following Sciatic Nerve Injury. *Cell Physiol Biochem*. 2018; 46:2347–57. <https://doi.org/10.1159/000489626> PMID:[29742504](https://pubmed.ncbi.nlm.nih.gov/29742504/)
43. Sun J, Marx SO, Chen HJ, Poon M, Marks AR, Rabbani LE. Role for p27(Kip1) in Vascular Smooth Muscle Cell Migration. *Circulation*. 2001; 103:2967–72. <https://doi.org/10.1161/01.CIR.103.24.2967> PMID:[11413088](https://pubmed.ncbi.nlm.nih.gov/11413088/)
44. Li WD, Zhou DM, Sun LL, Xiao L, Liu Z, Zhou M, Wang WB, Li XQ. LncRNA WTAPP1 Promotes Migration and Angiogenesis of Endothelial Progenitor Cells via MMP1 Through MicroRNA 3120 and Akt/PI3K/Autophagy Pathways. *Stem Cells*. 2018; 36:1863–74. <https://doi.org/10.1002/stem.2904> PMID:[30171660](https://pubmed.ncbi.nlm.nih.gov/30171660/)
45. Livak KJ, Schmittgen TD. Analysis of relative gene expression data using real-time quantitative PCR and the 2<sup>(-Delta Delta C(T))</sup> Method. *Methods*. 2001; 25:402–08. <https://doi.org/10.1006/meth.2001.1262> PMID:[11846609](https://pubmed.ncbi.nlm.nih.gov/11846609/)
